# Supplementary material for: Experimental evidence that female rhesus macaques (Macaca mulatta) perceive variation in male facial masculinity
Source: R Soc Open Sci. 2019 Jan 30;6(1):181415. doi: 10.1098/rsos.181415 (PMC6366174; doi:10.1098/rsos.181415)
Supplement: Trial Data [file rsos181415supp3.csv]

Trial	Date	Time	Sub_ID	Subject_Age	Sub_group	Groupmates	Masc_ID	Masc_age	Masc_group	Masc_col	Masc_lum	Masc_score	Fem_ID	Fem_age	Fem_group	Fem_col	Fem_lum	Fem_score	Masc_diff	MD_cat	MD_cat2	Masc_R1_L0	Tapped_first_R1_L0	Look_time	Looked_first_R1_L0	Left_time	Right_time	Longer_R1_L0	Longer_M1_F0	Masc_time	Fem_time	Masc_perc
1	3/18/15	11:38 AM	4A0	10	R	Fem	30Z	9	F	0.1448	145	2.09	36V	9	R	0.1246	144.5	1.664	25.6	0	0	0	1	149	1	65	84	1	0	65	84	43.62
2	3/18/15	12:06 PM	4I5	5	R	Fem	88V	9	S	0.056	169.5	2.175	6B2	7	R	0.0648	142.75	1.666	30.5	0	0	0	1	103	1	20	83	1	0	20	83	19.42
3	3/18/15	12:58 PM	9L7	4	R	None	73Z	8	KK	0.0739	152.25	2.194	1B1	9	HH	0.0671	152.75	1.713	28.1	0	0	1	1	178	0	106	72	0	0	72	106	40.45
4	3/19/15	9:46 AM	6B0	9	R	None	73Z	8	KK	0.0739	152.25	2.194	7B2	7	V	0.0783	143.75	1.483	47.9	1	1	1	1	118	1	66	52	0	1	52	66	44.07
5	3/25/15	9:53 AM	0J5	5	KK	None	44H	16	R	0.0722	197.25	2.054	7B2	7	V	0.0783	143.75	1.483	38.5	1	1	0	1	401	0	217	184	0	1	217	184	54.11
6	3/25/15	10:59 AM	2D4	8	S	None	73Z	8	KK	0.0739	152.25	2.194	96T	9	R	0.0897	181.25	1.671	31.3	0	0	0	1	114	1	70	44	0	0	70	44	61.40
7	3/25/15	11:26 AM	9K6	4	S	Masc	88V	9	S	0.056	169.5	2.175	81O	12	R	0.1287	126.25	1.727	25.9	0	0	1	1	137	0	116	21	0	0	21	116	15.33
8	3/25/15	11:50 AM	3F4	7	R	Fem	73Z	8	KK	0.0739	152.25	2.194	81O	12	R	0.1287	126.25	1.727	27	0	0	0	1	81	0	46	35	0	1	46	35	56.79
9	3/26/15	9:45 AM	3J4	5	S	Masc	88V	9	S	0.056	169.5	2.175	7B3	7	V	0.055	191	1.819	19.5	0	0	1	0	52	0	24	28	1	0	28	24	53.85
10	3/26/15	10:41 AM	4D8	8	KK	None	88V	9	S	0.056	169.5	2.175	93R	11	S	0.1034	145	1.505	44.5	1	1	1	0	180	0	115	65	0	0	65	115	36.11
11	3/26/15	10:56 AM	3G2	6	S	None	74Z	8	R	0.1676	138.75	2.25	1B1	9	HH	0.0671	152.75	1.713	31.4	0	1	1	1	110	1	36	74	1	1	74	36	67.27
12	3/26/15	11:47 AM	88N	15	S	None	74Z	8	R	0.1676	138.75	2.25	96T	9	R	0.0897	181.25	1.671	34.6	1	1	0	0	61	0	31	30	0	1	31	30	50.82
13	3/27/15	11:17 AM	38Z	11	S	None	76Z	8	HH	0.061	164	2.212	36V	9	R	0.1246	144.5	1.664	32.9	1	1	1	1	61	0	43	18	0	0	18	43	29.51
14	3/30/15	10:48 AM	*1E6	8	R	Both	83L	13	R	0.1001	187.25	2.361	36V	9	R	0.1246	144.5	1.664	41.8	1	1	0	0	115	1	73	42	0	0	73	42	63.48
15	3/30/15	11:13 AM	85V	11	R	Fem	61R	11	V	0.0304	214	2.055	6B2	7	R	0.0648	142.75	1.666	23.3	0	0	1	0	369	0	294	75	0	0	75	294	20.33
16	3/30/15	12:30 PM	7I4	5	S	None	61R	11	V	0.0304	214	2.055	1B1	9	HH	0.0671	152.75	1.713	20	0	0	0	0	67	0	36	31	0	1	36	31	53.73
17	3/30/15	12:57 PM	1F4	7	R	None	76Z	8	HH	0.061	164	2.212	7B3	7	V	0.055	191	1.819	21.6	0	0	0	0	120	1	63	57	0	0	63	57	52.50
18	3/31/15	10:16 AM	61J	16	F	None	74Z	8	R	0.1676	138.75	2.25	36V	9	R	0.1246	144.5	1.664	35.2	1	1	0	0	65	1	35	30	0	0	35	30	53.85
19	3/31/15	10:47 AM	2G3	6	V	Masc	61R	11	V	0.0304	214	2.055	98K	13	R	0.1463	145.25	1.773	15.9	0	0	1	0	172	1	114	58	0	1	58	114	33.72
20	3/31/15	11:22 AM	8F3	7	F	None	74Z	8	R	0.1676	138.75	2.25	7B2	7	V	0.0783	143.75	1.483	51.7	1	1	0	1	66	1	26	40	1	0	26	40	39.39
21	3/31/15	11:52 AM	36O	14	HH	None	61R	11	V	0.0304	214	2.055	96T	9	R	0.0897	181.25	1.671	22.9	0	0	0	1	140	1	70	70	Tie	0	70	70	50.00
22	3/31/15	12:02 PM	90P	13	MM	None	02R	11	R	0.1053	182.75	2.306	1B1	9	HH	0.0671	152.75	1.713	34.7	1	1	0	1	55	0	34	21	0	1	34	21	61.82
23	3/31/15	12:23 PM	63V	11	F	None	83L	13	R	0.1001	187.25	2.361	96T	9	R	0.0897	181.25	1.671	41.2	1	1	1	1	74	0	19	55	1	0	55	19	74.32
24	3/31/15	12:51 PM	7L7	4	HH	None	88V	9	S	0.056	169.5	2.175	36V	9	R	0.1246	144.5	1.664	30.7	0	0	1	0	191	0	66	125	1	0	125	66	65.45
25	4/1/15	10:14 AM	8J6	5	F	None	02R	11	R	0.1053	182.75	2.306	81O	12	R	0.1287	126.25	1.727	33.5	1	1	0	0	164	1	92	72	0	0	92	72	56.10
26	3/30/15	10:51 AM	5K4	4	F	None	02R	11	R	0.1053	182.75	2.306	93R	11	S	0.1034	145	1.505	53.3	1	1	1	0	50	1	14	36	1	1	36	14	72.00
27	4/1/15	11:29 AM	16S	13	HH	None	01K	14	R	0.1054	166	2.039	7B2	7	V	0.0783	143.75	1.483	37.5	1	1	0	0	53	1	43	10	0	0	43	10	81.13
28	4/1/15	11:58 AM	7J8	5	F	None	73Z	8	KK	0.0739	152.25	2.194	6B2	7	R	0.0648	142.75	1.666	31.7	1	1	1	0	382	0	155	227	1	0	227	155	59.42
29	4/2/15	12:10 PM	4I3	5	S	None	83L	13	R	0.1001	187.25	2.361	7B2	7	V	0.0783	143.75	1.483	59.2	1	1	0	1	31	1	24	7	0	0	24	7	77.42
30	4/2/15	12:24 PM	0L9	4	S	None	76Z	8	HH	0.061	164	2.212	81O	12	R	0.1287	126.25	1.727	28.1	0	0	1	0	368	0	212	156	0	0	156	212	42.39
31	4/2/15	12:38 PM	9C7	8	S	None	44H	16	R	0.0722	197.25	2.054	96T	9	R	0.0897	181.25	1.671	22.9	0	0	0	0	197	0	127	70	0	1	127	70	64.47
32	4/3/15	10:19 AM	22H	18	HH	None	30Z	9	F	0.1448	145	2.09	96T	9	R	0.0897	181.25	1.671	25	0	0	1	0	50	0	22	28	1	0	28	22	56.00
33	4/3/15	10:48 AM	4J6	5	HH	None	44H	16	R	0.0722	197.25	2.054	50P	12	F	0.1138	167	1.462	40.4	1	1	0	1	270	0	66	204	1	1	66	204	24.44
34	4/3/15	11:06 AM	9I7	5	HH	None	88V	9	S	0.056	169.5	2.175	7B2	7	V	0.0783	143.75	1.483	46.7	1	1	0	1	172	0	111	61	0	1	111	61	64.53
35	4/3/15	11:47 AM	*2E9	8	HH	None	02R	11	R	0.1053	182.75	2.306	50P	12	F	0.1138	167	1.462	57.7	1	1	0	0	66	0	38	28	0	1	38	28	57.58
36	4/3/15	11:59 AM	4J3	5	HH	None	01K	14	R	0.1054	166	2.039	81O	12	R	0.1287	126.25	1.727	18	0	0	0	0	246	1	123	123	Tie	1	123	123	50.00
37	4/6/15	9:38 AM	76J	16	KK	None	88V	9	S	0.056	169.5	2.175	1B1	9	HH	0.0671	152.75	1.713	27	0	0	1	0	51	0	24	27	1	0	27	24	52.94
38	4/6/15	9:47 AM	4F1	7	KK	None	61R	11	V	0.0304	214	2.055	7B3	7	V	0.055	191	1.819	12.9	0	0	0	0	160	1	91	69	0	0	91	69	56.88
39	4/6/15	10:01 AM	6L1	4	KK	None	83L	13	R	0.1001	187.25	2.361	6B2	7	R	0.0648	142.75	1.666	41.7	1	1	1	1	149	1	65	84	1	1	84	65	56.38
40	4/6/15	12:45 PM	09Z	11	R	Both	44H	16	R	0.0722	197.25	2.054	81O	12	R	0.1287	126.25	1.727	18.9	0	0	0	0	98	0	92	6	0	1	92	6	93.88
41	4/6/15	12:53 PM	93I	17	R	Both	01K	14	R	0.1054	166	2.039	98K	13	R	0.1463	145.25	1.773	15	0	0	0	0	126	0	49	77	1	1	49	77	38.89
42	4/7/15	10:32 AM	5L5	4	R	Masc	74Z	8	R	0.1676	138.75	2.25	93R	11	S	0.1034	145	1.505	49.5	1	1	1	0	247	0	90	157	1	0	157	90	63.56
43	4/7/15	11:20 AM	24V	11	KK	Masc	73Z	8	KK	0.0739	152.25	2.194	36V	9	R	0.1246	144.5	1.664	31.8	1	1	1	1	58	1	21	37	1	1	37	21	63.79
44	4/7/15	11:37 AM	49V	11	KK	None	30Z	9	F	0.1448	145	2.09	6B2	7	R	0.0648	142.75	1.666	25.4	0	0	0	0	76	1	7	69	1	0	7	69	9.21
45	4/7/15	11:53 AM	2B1	9	S	None	02R	11	R	0.1053	182.75	2.306	7B2	7	V	0.0783	143.75	1.483	55.5	1	1	1	1	82	1	31	51	1	1	51	31	62.20
46	4/7/15	12:07 PM	2B4	9	S	None	74Z	8	R	0.1676	138.75	2.25	98K	13	R	0.1463	145.25	1.773	26.9	0	0	0	1	49	1	9	40	1	0	9	40	18.37
47	4/7/15	12:31 PM	9L9	4	KK	None	74Z	8	R	0.1676	138.75	2.25	81O	12	R	0.1287	126.25	1.727	30.3	0	0	0	0	161	0	65	96	1	1	65	96	40.37
48	4/8/15	10:25 AM	3A9	10	HH	None	30Z	9	F	0.1448	145	2.09	50P	12	F	0.1138	167	1.462	42.9	1	1	0	1	161	0	93	68	0	1	93	68	57.76
49	4/8/15	10:32 AM	*8E0	7	HH	None	74Z	8	R	0.1676	138.75	2.25	7B3	7	V	0.055	191	1.819	23.7	0	0	0	0	35	0	13	22	1	1	13	22	37.14
50	4/8/15	11:51 AM	*3E7	8	F	None	44H	16	R	0.0722	197.25	2.054	36V	9	R	0.1246	144.5	1.664	23.4	0	0	1	1	204	0	135	69	0	0	69	135	33.82
51	4/8/15	12:41 PM	4M6	3	R	None	30Z	9	F	0.1448	145	2.09	7B3	7	V	0.055	191	1.819	14.9	0	0	1	0	251	1	145	106	0	1	106	145	42.23
52	4/9/15	10:10 AM	3D1	8	S	None	76Z	8	HH	0.061	164	2.212	96T	9	R	0.0897	181.25	1.671	32.4	1	1	0	1	87	1	69	18	0	0	69	18	79.31
53	4/9/15	10:35 AM	5L6	4	R	Masc	01K	14	R	0.1054	166	2.039	93R	11	S	0.1034	145	1.505	35.5	1	1	1	1	260	1	114	146	1	1	146	114	56.15
54	4/9/15	10:51 AM	*1E2	8	KK	None	61R	11	V	0.0304	214	2.055	36V	9	R	0.1246	144.5	1.664	23.5	0	0	1	0	28	1	11	17	1	1	17	11	60.71
55	4/9/15	11:10 AM	2F3	7	S	Fem	76Z	8	HH	0.061	164	2.212	93R	11	S	0.1034	145	1.505	47	1	1	0	0	143	0	113	30	0	1	113	30	79.02
56	4/9/15	11:59 AM	73C	21	HH	None	02R	11	R	0.1053	182.75	2.306	6B2	7	R	0.0648	142.75	1.666	38.4	1	1	1	0	206	1	80	126	1	1	126	80	61.17
57	4/9/15	12:10 PM	03Z	11	HH	None	44H	16	R	0.0722	197.25	2.054	93R	11	S	0.1034	145	1.505	36.5	1	1	1	1	90	0	34	56	1	0	56	34	62.22
58	4/13/15	10:43 AM	0L8	4	S	None	01K	14	R	0.1054	166	2.039	36V	9	R	0.1246	144.5	1.664	22.5	0	0	0	0	220	0	93	127	1	1	93	127	42.27
59	4/13/15	11:11 AM	4K0	4	R	Both	02R	11	R	0.1053	182.75	2.306	36V	9	R	0.1246	144.5	1.664	38.6	1	1	0	0	258	0	226	32	0	1	226	32	87.60
60	4/13/15	11:33 AM	77S	12	HH	None	83L	13	R	0.1001	187.25	2.361	7B3	7	V	0.055	191	1.819	29.8	0	0	1	0	242	1	130	112	0	1	112	130	46.28
61	4/13/15	12:08 PM	1H6	6	F	Masc	30Z	9	F	0.1448	145	2.09	81O	12	R	0.1287	126.25	1.727	21	0	0	0	0	186	1	106	80	0	0	106	80	56.99
62	4/13/15	12:37 PM	8B0	9	F	None	01K	14	R	0.1054	166	2.039	96T	9	R	0.0897	181.25	1.671	22	0	0	0	0	121	0	36	85	1	1	36	85	29.75
63	4/14/15	11:28 AM	00O	15	F	None	73Z	8	KK	0.0739	152.25	2.194	98K	13	R	0.1463	145.25	1.773	23.7	0	0	0	1	93	1	50	43	0	0	50	43	53.76
64	4/14/15	10:51 AM	0C6	9	MM	None	61R	11	V	0.0304	214	2.055	93R	11	S	0.1034	145	1.505	36.5	1	1	0	0	95	1	75	20	0	0	75	20	78.95
65	4/14/15	11:28 AM	8J0	5	MM	None	44H	16	R	0.0722	197.25	2.054	98K	13	R	0.1463	145.25	1.773	15.8	0	0	1	1	155	0	98	57	0	0	57	98	36.77
66	4/14/15	11:36 AM	*2E1	8	MM	None	02R	11	R	0.1053	182.75	2.306	98K	13	R	0.1463	145.25	1.773	30.1	0	0	0	0	200	0	38	162	1	1	38	162	19.00
67	4/14/15	11:43 AM	2L5	4	F	Fem	73Z	8	KK	0.0739	152.25	2.194	50P	12	F	0.1138	167	1.462	50	1	1	0	0	133	1	50	83	1	0	50	83	37.59
68	4/14/15	11:56 AM	56R	13	HH	Masc	76Z	8	HH	0.061	164	2.212	7B2	7	V	0.0783	143.75	1.483	49.2	1	1	1	0	102	1	49	53	1	1	53	49	51.96
69	4/14/15	12:28 PM	6M9	3	S	None	30Z	9	F	0.1448	145	2.09	7B2	7	V	0.0783	143.75	1.483	40.9	1	1	0	0	270	0	155	115	0	1	155	115	57.41
70	4/15/15	10:35 AM	7N7	3	MM	None	44H	16	R	0.0722	197.25	2.054	1B1	9	HH	0.0671	152.75	1.713	19.9	0	0	0	1	177	1	112	65	0	0	112	65	63.28
71	4/15/15	11:32 AM	34N	15	F	None	76Z	8	HH	0.061	164	2.212	36V	9	R	0.1246	144.5	1.664	32.9	1	1	0	0	60	1	23	37	1	0	23	37	38.33
72	4/16/15	10:13 AM	98V	11	S	None	73Z	8	KK	0.0739	152.25	2.194	96T	9	R	0.0897	181.25	1.671	31.3	0	0	0	1	107	0	70	37	0	1	70	37	65.42
73	4/16/15	10:27 AM	4A5	10	R	None	61R	11	V	0.0304	214	2.055	7B2	7	V	0.0783	143.75	1.483	38.6	1	1	1	1	222	1	131	91	0	1	91	131	40.99
74	4/16/15	10:37 AM	2C8	9	R	Masc	44H	16	R	0.0722	197.25	2.054	7B3	7	V	0.055	191	1.819	12.9	0	0	1	0	44	0	12	32	1	0	32	12	72.73
75	4/16/15	10:45 AM	2J5	5	R	None	73Z	8	KK	0.0739	152.25	2.194	1B1	9	HH	0.0671	152.75	1.713	28.1	0	0	0	1	33	0	12	21	1	1	12	21	36.36
76	4/16/15	10:51 AM	28I	17	R	None	76Z	8	HH	0.061	164	2.212	1B1	9	HH	0.0671	152.75	1.713	29.2	0	0	0	1	138	0	97	41	0	1	97	41	70.29
77	4/16/15	11:10 AM	9J5	5	R	Both	83L	13	R	0.1001	187.25	2.361	81O	12	R	0.1287	126.25	1.727	36.7	1	1	1	0	296	1	172	124	0	1	124	172	41.89
78	4/16/15	11:20 AM	5M3	3	R	Both	02R	11	R	0.1053	182.75	2.306	96T	9	R	0.0897	181.25	1.671	38	1	1	1	0	418	0	233	185	0	0	185	233	44.26
79	4/16/15	11:32 AM	8L8	4	R	Masc	02R	11	R	0.1053	182.75	2.306	7B3	7	V	0.055	191	1.819	26.8	0	0	1	1	191	0	125	66	0	0	66	125	34.55
80	4/16/15	11:46 AM	4F8	7	R	Fem	61R	11	V	0.0304	214	2.055	81O	12	R	0.1287	126.25	1.727	19	0	0	1	1	161	0	73	88	1	0	88	73	54.66
81	4/20/15	10:42 AM	29B	22	F	None	74Z	8	R	0.1676	138.75	2.25	6B2	7	R	0.0648	142.75	1.666	35.1	1	1	1	1	139	0	98	41	0	0	41	98	29.50
82	4/20/15	10:56 AM	35N	15	F	None	01K	14	R	0.1054	166	2.039	1B1	9	HH	0.0671	152.75	1.713	19	0	0	0	0	163	1	92	71	0	0	92	71	56.44
83	4/20/15	11:18 AM	*3E2	8	F	None	83L	13	R	0.1001	187.25	2.361	98K	13	R	0.1463	145.25	1.773	33.1	1	1	0	1	141	1	45	96	1	0	45	96	31.91
84	4/21/15	10:35 AM	8C0	8	F	None	01K	14	R	0.1054	166	2.039	6B2	7	R	0.0648	142.75	1.666	22.4	0	0	1	0	256	0	138	118	0	0	118	138	46.09
85	4/21/15	11:16 AM	2J8	5	F	Fem	74Z	8	R	0.1676	138.75	2.25	50P	12	F	0.1138	167	1.462	53.9	1	1	0	0	175	0	81	94	1	1	81	94	46.29
86	4/21/15	11:51 AM	4I9	5	HH	Masc	76Z	8	HH	0.061	164	2.212	50P	12	F	0.1138	167	1.462	51.3	1	1	1	0	116	0	65	51	0	0	51	65	43.97
87	4/21/15	12:10 PM	9K0	4	MM	None	88V	9	S	0.056	169.5	2.175	50P	12	F	0.1138	167	1.462	48.7	1	1	0	0	305	0	179	126	0	1	179	126	58.69
88	4/22/15	10:25 AM	33V	11	R	None	61R	11	V	0.0304	214	2.055	93R	11	S	0.1034	145	1.505	36.5	1	1	1	0	41	1	20	21	1	1	21	20	51.22
89	4/22/15	10:49 AM	4H0	6	R	Fem	76Z	8	HH	0.061	164	2.212	6B2	7	R	0.0648	142.75	1.666	32.8	1	1	0	1	273	0	180	93	0	1	180	93	65.93
90	4/22/15	11:07 AM	3M7	3	R	Masc	01K	14	R	0.1054	166	2.039	50P	12	F	0.1138	167	1.462	39.4	1	1	0	0	186	0	116	70	0	1	116	70	62.37
91	4/23/15	10:30 AM	9C2	8	MM	None	83L	13	R	0.1001	187.25	2.361	50P	12	F	0.1138	167	1.462	61.4	1	1	1	0	85	1	19	66	1	1	66	19	77.65
92	4/23/15	10:47 AM	6J0	5	MM	None	44H	16	R	0.0722	197.25	2.054	7B3	7	V	0.055	191	1.819	12.9	0	0	0	1	110	1	45	65	1	0	45	65	40.91
93	4/23/15	11:28 AM	87K	16	MM	None	73Z	8	KK	0.0739	152.25	2.194	36V	9	R	0.1246	144.5	1.664	31.8	1	1	0	1	62	1	25	37	1	0	25	37	40.32
94	4/27/15	10:37 AM	7M6	3	R	None	73Z	8	KK	0.0739	152.25	2.194	7B2	7	V	0.0783	143.75	1.483	47.9	1	1	0	1	204	1	103	101	0	0	103	101	50.49
95	4/27/15	11:14 AM	54N	15	R	None	88V	9	S	0.056	169.5	2.175	7B3	7	V	0.055	191	1.819	19.5	0	0	0	0	98	0	53	45	0	1	53	45	54.08
96	4/27/15	11:35 AM	5F7	7	R	Both	74Z	8	R	0.1676	138.75	2.25	96T	9	R	0.0897	181.25	1.671	34.6	1	1	1	0	53	1	16	37	1	1	37	16	69.81
97	4/27/15	11:57 AM	0.00E+00	8	R	None	88V	9	S	0.056	169.5	2.175	93R	11	S	0.1034	145	1.505	44.5	1	1	0	1	72	1	49	23	0	0	49	23	68.06
98	4/29/15	10:46 AM	3I4	5	S	None	61R	11	V	0.0304	214	2.055	1B1	9	HH	0.0671	152.75	1.713	20	0	0	1	1	145	0	60	85	1	0	85	60	58.62
99	4/29/15	10:08 AM	6K9	4	R	Masc	01K	14	R	0.1054	166	2.039	1B1	9	HH	0.0671	152.75	1.713	19	0	0	1	1	274	0	133	141	1	0	141	133	51.46
100	4/29/15	10:40 AM	7L1	4	R	None	30Z	9	F	0.1448	145	2.09	7B2	7	V	0.0783	143.75	1.483	40.9	1	1	1	1	140	0	34	106	1	0	106	34	75.71
101	4/29/15	10:51 AM	51T	12	R	Fem	61R	11	V	0.0304	214	2.055	81O	12	R	0.1287	126.25	1.727	19	0	0	0	0	131	0	118	13	0	1	118	13	90.08
102	3/31/15	12:35 PM	28G	18	MM	None	83L	13	R	0.1001	187.25	2.361	50P	12	F	0.1138	167	1.462	61.4	1	1	0	0	73	1	40	33	0	0	40	33	54.79
103	4/3/15	11:31 AM	*1E0	8	MM	None	76Z	8	HH	0.061	164	2.212	98K	13	R	0.1463	145.25	1.773	24.8	0	0	0	1	109	1	44	65	1	0	44	65	40.37
104	4/14/15	11:15 AM	5D9	8	MM	None	01K	14	R	0.1054	166	2.039	7B3	7	V	0.055	191	1.819	12.1	0	0	0	0	89	0	50	39	0	1	50	39	56.18
105	4/27/15	11:25 AM	7A8	10	R	None	30Z	9	F	0.1448	145	2.09	7B3	7	V	0.055	191	1.819	14.9	0	0	0	1	192	1	42	150	1	0	42	150	21.88
106	4/29/15	10:25 AM	4A9	10	S	None	74Z	8	R	0.1676	138.75	2.25	7B2	7	V	0.0783	143.75	1.483	51.7	1	1	1	0	194	0	118	76	0	0	76	118	39.18
107	4/2/15	11:37 AM	5A0	10	S	Masc	88V	9	S	0.056	169.5	2.175	50P	12	F	0.1138	167	1.462	48.7	1	1	1	1	58	0	25	33	1	0	33	25	56.90
